# Supplementary material
Source: PubMed Central journal article supplement (PMC7000123)
Supplement: 156561_1_supp_430106_q11094.pdf [file 156561_1_supp_430106_q11094.pdf]

| #1 | b <sup>+</sup> | b <sup>2+</sup> | Seq.       | y <sup>+</sup> | y <sup>2+</sup> | #2 |
|----|----------------|-----------------|------------|----------------|-----------------|----|
| 1  | 301.20732      | 151.10730       | A-TMT6plex |                |                 | 10 |
| 2  | 414.29139      | 207.64933       | I          | 872.45846      | 436.73287       | 9  |
| 3  | 471.31285      | 236.16006       | G          | 759.37439      | 380.19083       | 8  |
| 4  | 542.34996      | 271.67862       | A          | 702.35293      | 351.68010       | 7  |
| 5  | 613.38708      | 307.19718       | A          | 631.31581      | 316.16155       | 6  |
| 6  | 741.44565      | 371.22647       | Q          | 560.27870      | 280.64299       | 5  |
| 7  | 856.47260      | 428.73994       | D          | 432.22012      | 216.61370       | 4  |
| 8  | 927.50971      | 464.25849       | A          | 317.19318      | 159.10023       | 3  |
| 9  | 998.54683      | 499.77705       | A          | 246.15607      | 123.58167       | 2  |
| 10 |                |                 | R          | 175.11895      | 88.06311        | 1  |

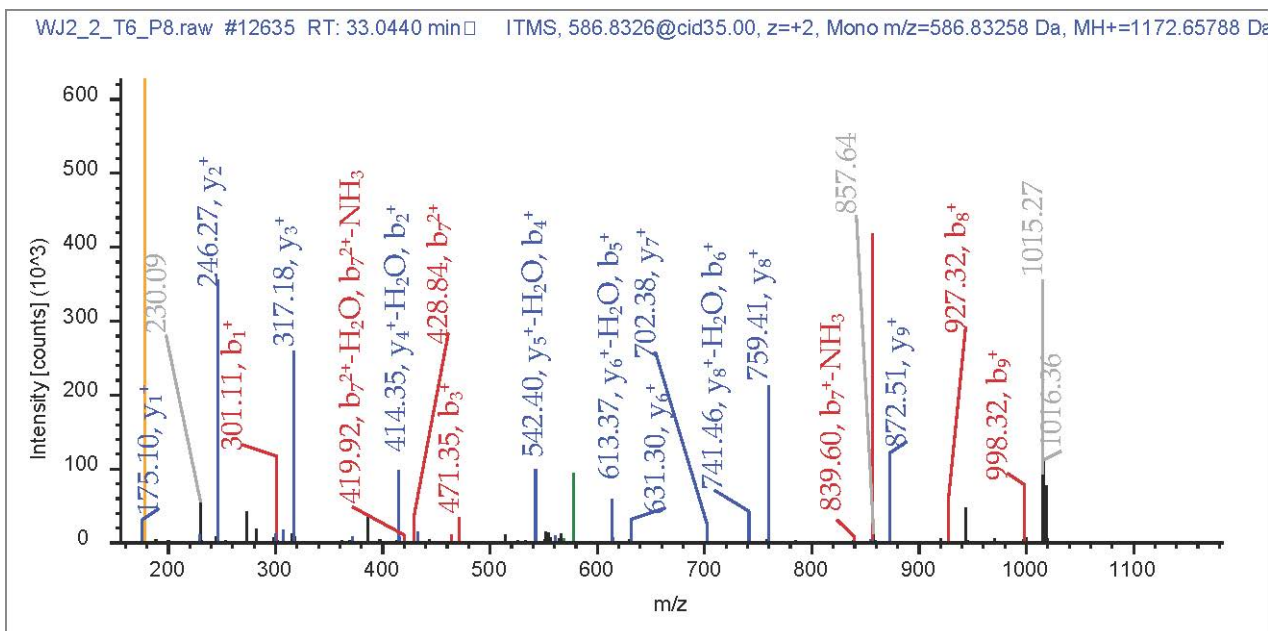

R19\_\_845

| #1 | b <sup>+</sup> | b <sup>2+</sup> | Seq.       | y <sup>+</sup> | y <sup>2+</sup> | #2 |
|----|----------------|-----------------|------------|----------------|-----------------|----|
| 1  | 301.20732      | 151.10730       | A-TMT6plex |                |                 | 8  |
| 2  | 402.25500      | 201.63114       | T          | 1045.64548     | 523.32638       | 7  |
| 3  | 501.32341      | 251.16535       | V          | 944.59780      | 472.80254       | 6  |
| 4  | 630.36601      | 315.68664       | E          | 845.52938      | 423.26833       | 5  |
| 5  | 744.40894      | 372.70811       | N          | 716.48679      | 358.74703       | 4  |
| 6  | 857.49300      | 429.25014       | L          | 602.44386      | 301.72557       | 3  |
| 7  | 970.57706      | 485.79217       | L          | 489.35980      | 245.18354       | 2  |
| 8  |                |                 | K-TMT6plex | 376.27574      | 188.64151       | 1  |

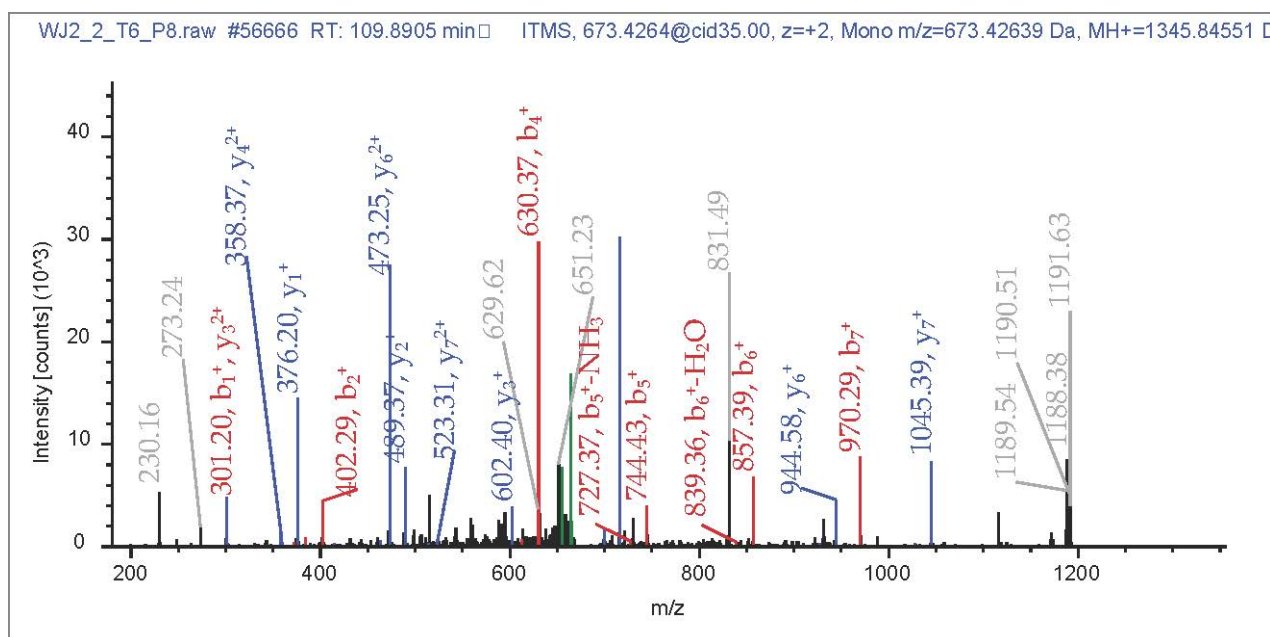

R19\_7470

| #1 | b <sup>+</sup> | b <sup>2+</sup> | b <sup>3+</sup> | Seq.       | y <sup>+</sup> | y <sup>2+</sup> |
|----|----------------|-----------------|-----------------|------------|----------------|-----------------|
| 1  | 345.19715      | 173.10221       | 115.73723       | D-TMT6plex |                |                 |
| 2  | 460.22409      | 230.61569       | 154.07955       | D          | 1029.45958     | 515.23343       |
| 3  | 547.25612      | 274.13170       | 183.09023       | S          | 914.43263      | 457.71996       |
| 4  | 618.29324      | 309.65026       | 206.76926       | A          | 827.40061      | 414.20394       |
| 5  | 717.36165      | 359.18446       | 239.79207       | V          | 756.36349      | 378.68538       |
| 6  | 854.42056      | 427.71392       | 285.47837       | H          | 657.29508      | 329.15118       |
| 7  | 941.45259      | 471.22993       | 314.48905       | S          | 520.23617      | 260.62172       |
| 8  | 1070.49518     | 535.75123       | 357.50325       | E          | 433.20414      | 217.10571       |
| 9  | 1199.53778     | 600.27253       | 400.51744       | E          | 304.16155      | 152.58441       |
| 10 |                |                 |                 | R          | 175.11895      | 88.06311        |

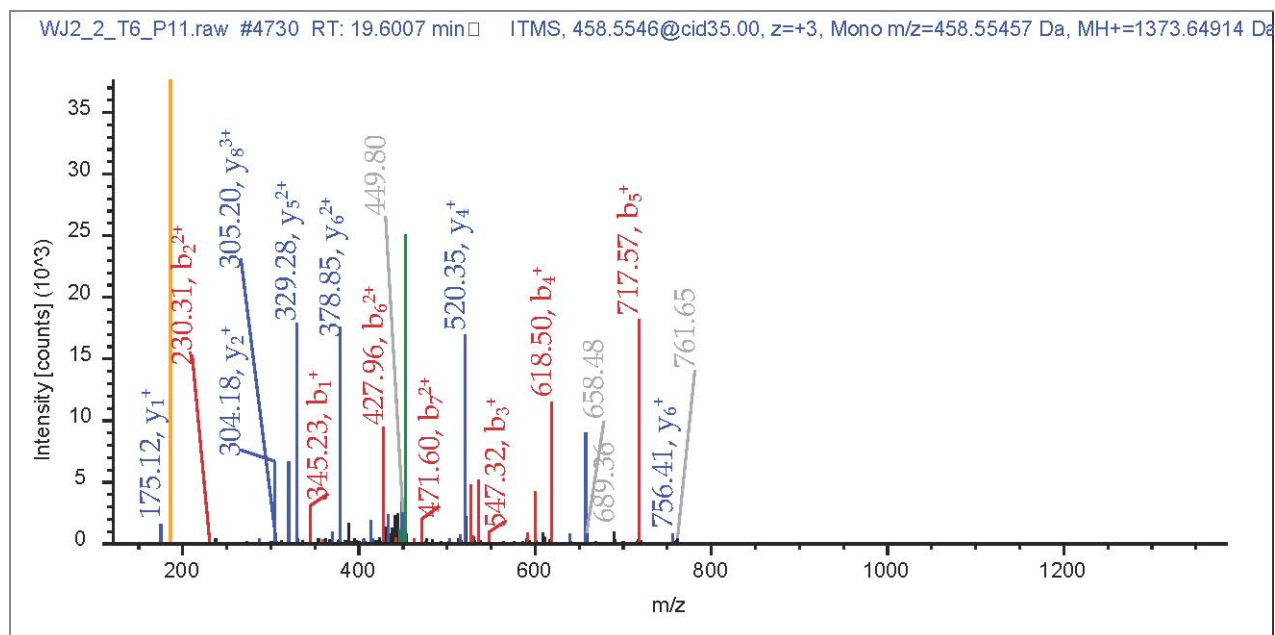

R19\_6884

| $y^{3+}$  | #2 |
|-----------|----|
|           | 10 |
| 343.82471 | 9  |
| 305.48240 | 8  |
| 276.47172 | 7  |
| 252.79268 | 6  |
| 219.76988 | 5  |
| 174.08357 | 4  |
| 145.07290 | 3  |
| 102.05870 | 2  |
| 59.04450  | 1  |

| #1 | b <sup>+</sup> | b <sup>2+</sup> | Seq.       | y <sup>+</sup> | y <sup>2+</sup> | #2 |
|----|----------------|-----------------|------------|----------------|-----------------|----|
| 1  | 359.21280      | 180.11004       | E-TMT6plex |                |                 | 10 |
| 2  | 474.23974      | 237.62351       | D          | 1039.41494     | 520.21111       | 9  |
| 3  | 531.26121      | 266.13424       | G          | 924.38799      | 462.69763       | 8  |
| 4  | 588.28267      | 294.64497       | G          | 867.36653      | 434.18690       | 7  |
| 5  | 719.32316      | 360.16522       | M          | 810.34507      | 405.67617       | 6  |
| 6  | 816.37592      | 408.69160       | P          | 679.30458      | 340.15593       | 5  |
| 7  | 931.40286      | 466.20507       | D          | 582.25182      | 291.62955       | 4  |
| 8  | 1094.46619     | 547.73673       | Y          | 467.22487      | 234.11608       | 3  |
| 9  | 1223.50878     | 612.25803       | E          | 304.16155      | 152.58441       | 2  |
| 10 |                |                 | R          | 175.11895      | 88.06311        | 1  |

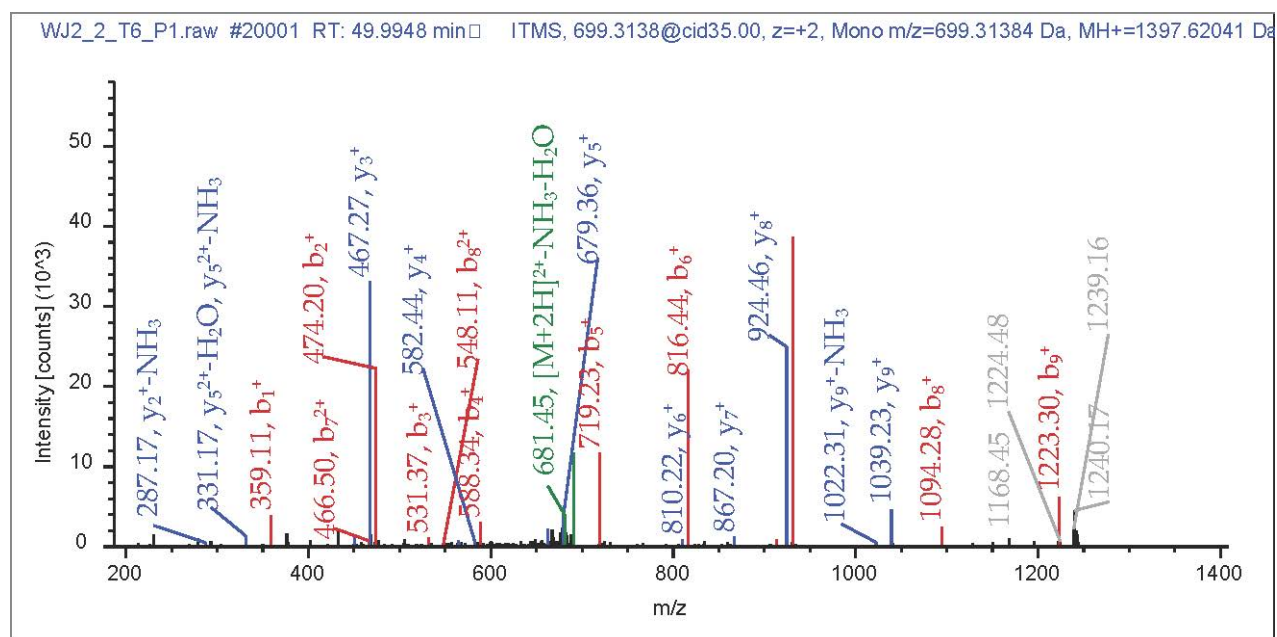

R19\_2405

| #1 | b <sup>+</sup> | b <sup>2+</sup> | Seq.       | y <sup>+</sup> | y <sup>2+</sup> | #2 |
|----|----------------|-----------------|------------|----------------|-----------------|----|
| 1  | 359.21280      | 180.11004       | E-TMT6plex |                |                 | 11 |
| 2  | 473.25573      | 237.13150       | N          | 1214.69422     | 607.85075       | 10 |
| 3  | 570.30849      | 285.65788       | P          | 1100.65129     | 550.82928       | 9  |
| 4  | 685.33544      | 343.17136       | D          | 1003.59853     | 502.30290       | 8  |
| 5  | 786.38311      | 393.69520       | T          | 888.57158      | 444.78943       | 7  |
| 6  | 843.40458      | 422.20593       | G          | 787.52391      | 394.26559       | 6  |
| 7  | 900.42604      | 450.71666       | G          | 730.50244      | 365.75486       | 5  |
| 8  | 1013.51011     | 507.25869       | I          | 673.48098      | 337.24413       | 4  |
| 9  | 1084.54722     | 542.77725       | A          | 560.39691      | 280.70210       | 3  |
| 10 | 1197.63128     | 599.31928       | I          | 489.35980      | 245.18354       | 2  |
| 11 |                |                 | K-TMT6plex | 376.27574      | 188.64151       | 1  |

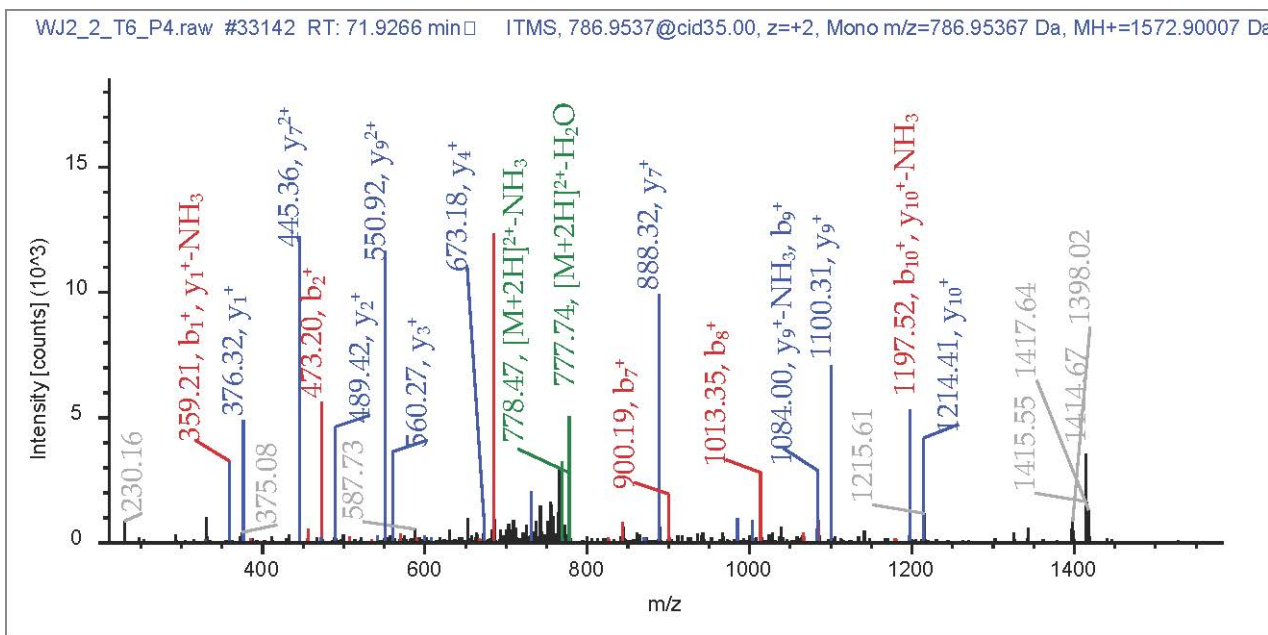

R19\_3280

| #1 | b <sup>+</sup> | b <sup>2+</sup> | b <sup>3+</sup> | Seq.       | y <sup>+</sup> | y <sup>2+</sup> |
|----|----------------|-----------------|-----------------|------------|----------------|-----------------|
| 1  | 359.21280      | 180.11004       | 120.40912       | E-TMT6plex |                |                 |
| 2  | 487.27138      | 244.13933       | 163.09531       | Q          | 1155.58651     | 578.29689       |
| 3  | 615.32996      | 308.16862       | 205.78150       | Q          | 1027.52793     | 514.26760       |
| 4  | 702.36198      | 351.68463       | 234.79218       | S          | 899.46935      | 450.23832       |
| 5  | 773.39910      | 387.20319       | 258.47122       | A          | 812.43733      | 406.72230       |
| 6  | 910.45801      | 455.73264       | 304.15752       | H          | 741.40021      | 371.20374       |
| 7  | 1011.50569     | 506.25648       | 337.84008       | T          | 604.34130      | 302.67429       |
| 8  | 1124.58975     | 562.79851       | 375.53477       | I          | 503.29362      | 252.15045       |
| 9  | 1211.62178     | 606.31453       | 404.54544       | S          | 390.20956      | 195.60842       |
| 10 | 1339.68036     | 670.34382       | 447.23164       | Q          | 303.17753      | 152.09240       |
| 11 |                |                 |                 | R          | 175.11895      | 88.06311        |

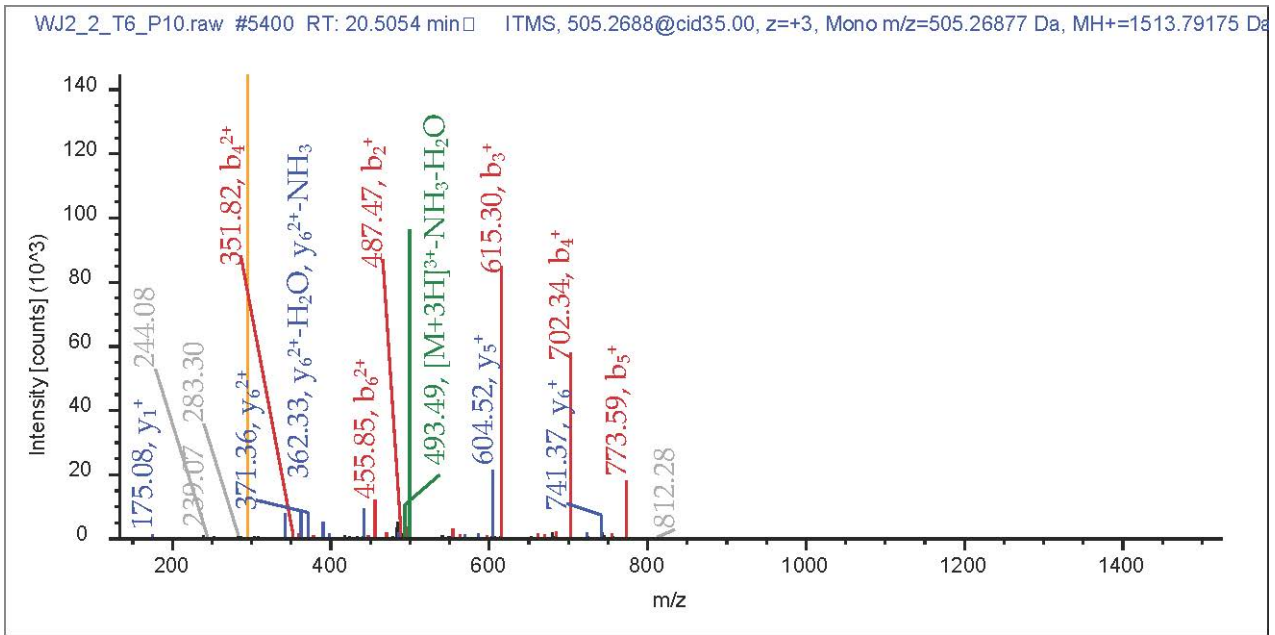

R19\_1000

| $y^{3+}$  | #2 |
|-----------|----|
|           | 11 |
| 385.86702 | 10 |
| 343.18083 | 9  |
| 300.49464 | 8  |
| 271.48396 | 7  |
| 247.80492 | 6  |
| 202.11862 | 5  |
| 168.43606 | 4  |
| 130.74137 | 3  |
| 101.73069 | 2  |
| 59.04450  | 1  |



| #1 | b <sup>+</sup> | b <sup>2+</sup> | Seq.       | y <sup>+</sup> | y <sup>2+</sup> | #2 |
|----|----------------|-----------------|------------|----------------|-----------------|----|
| 1  | 359.21280      | 180.11004       | E-TMT6plex |                |                 | 9  |
| 2  | 446.24483      | 223.62605       | S          | 1103.61457     | 552.31092       | 8  |
| 3  | 533.27686      | 267.14207       | S          | 1016.58254     | 508.79491       | 7  |
| 4  | 662.31945      | 331.66336       | E          | 929.55051      | 465.27890       | 6  |
| 5  | 761.38787      | 381.19757       | V          | 800.50792      | 400.75760       | 5  |
| 6  | 860.45628      | 430.73178       | V          | 701.43951      | 351.22339       | 4  |
| 7  | 957.50904      | 479.25816       | P          | 602.37109      | 301.68918       | 3  |
| 8  | 1086.55164     | 543.77946       | E          | 505.31833      | 253.16280       | 2  |
| 9  |                |                 | K-TMT6plex | 376.27574      | 188.64151       | 1  |

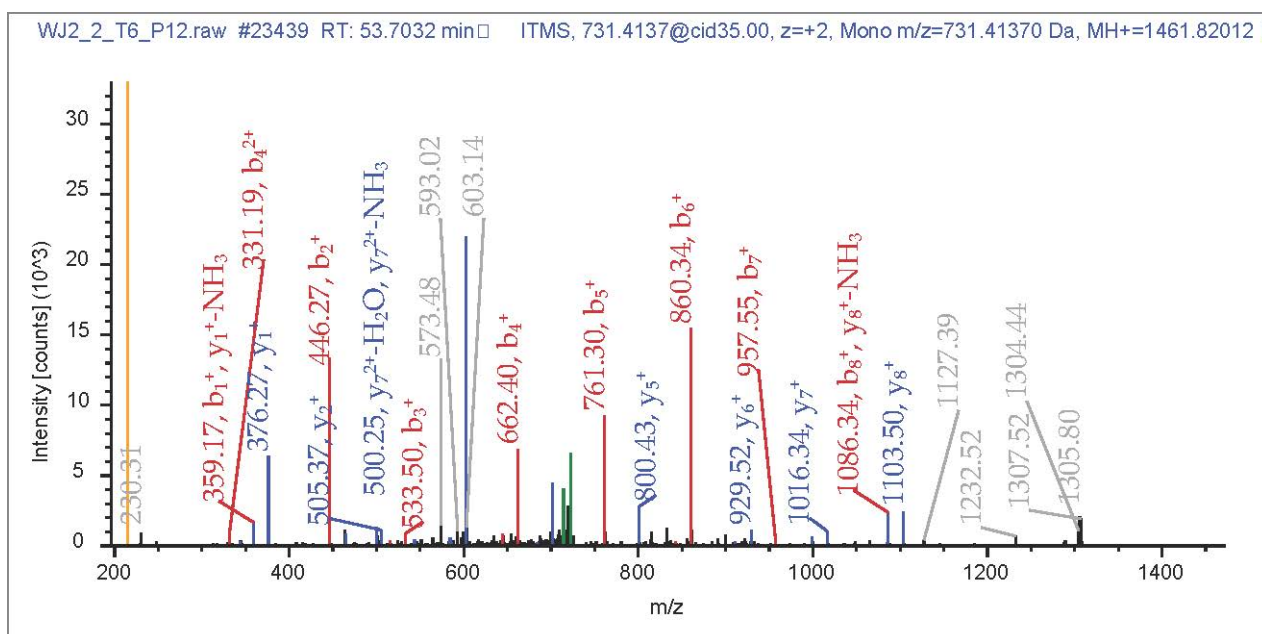

R19\_5177

| #1 | b <sup>+</sup> | b <sup>2+</sup> | Seq.          | y <sup>+</sup> | y <sup>2+</sup> | #2 |
|----|----------------|-----------------|---------------|----------------|-----------------|----|
| 1  | 359.21280      | 180.11004       | E-TMT6plex    |                |                 | 9  |
| 2  | 458.28122      | 229.64425       | V             | 974.50878      | 487.75803       | 8  |
| 3  | 571.36528      | 286.18628       | I             | 875.44036      | 438.22382       | 7  |
| 4  | 699.42386      | 350.21557       | Q             | 762.35630      | 381.68179       | 6  |
| 5  | 770.46097      | 385.73412       | A             | 634.29772      | 317.65250       | 5  |
| 6  | 885.48791      | 443.24760       | D             | 563.26061      | 282.13394       | 4  |
| 7  | 998.57198      | 499.78963       | I             | 448.23366      | 224.62047       | 3  |
| 8  | 1158.60263     | 579.80495       | Carbamidometh | 335.14960      | 168.07844       | 2  |
| 9  |                |                 | R             | 175.11895      | 88.06311        | 1  |

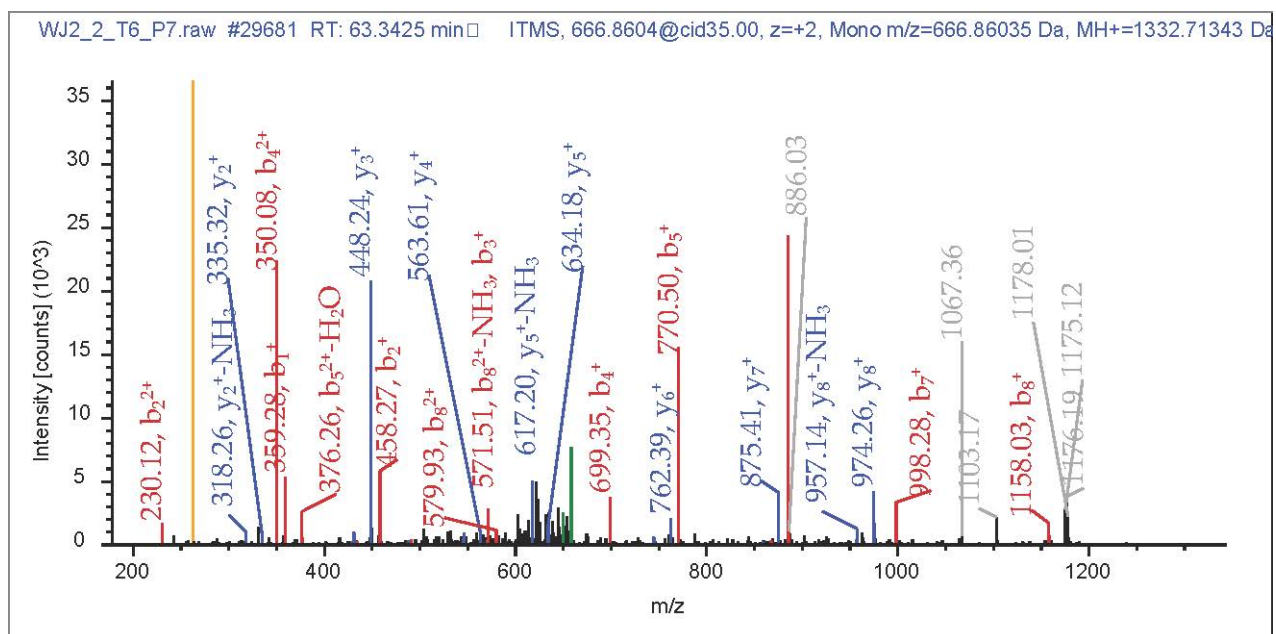

R19\_7456

| #1 | b <sup>+</sup> | b <sup>2+</sup> | b <sup>3+</sup> | Seq.          | y <sup>+</sup> | y <sup>2+</sup> |
|----|----------------|-----------------|-----------------|---------------|----------------|-----------------|
| 1  | 359.21280      | 180.11004       | 120.40912       | E-TMT6plex    |                |                 |
| 2  | 522.27613      | 261.64170       | 174.76356       | Y             | 2916.33161     | 1458.66944      |
| 3  | 635.36019      | 318.18374       | 212.45825       | I             | 2753.26828     | 1377.13778      |
| 4  | 706.39731      | 353.70229       | 236.13729       | A             | 2640.18421     | 1320.59574      |
| 5  | 821.42425      | 411.21576       | 274.47960       | D             | 2569.14710     | 1285.07719      |
| 6  | 981.45490      | 491.23109       | 327.82315       | Carbamidomett | 2454.12016     | 1227.56372      |
| 7  | 1096.48184     | 548.74456       | 366.16547       | D             | 2294.08951     | 1147.54839      |
| 8  | 1153.50331     | 577.25529       | 385.17262       | G             | 2179.06257     | 1090.03492      |
| 9  | 1240.53533     | 620.77131       | 414.18330       | S             | 2122.04110     | 1061.52419      |
| 10 | 1353.61940     | 677.31334       | 451.87798       | L             | 2035.00907     | 1018.00817      |
| 11 | 1450.67216     | 725.83972       | 484.22891       | P             | 1921.92501     | 961.46614       |
| 12 | 1537.70419     | 769.35573       | 513.23958       | S             | 1824.87225     | 912.93976       |
| 13 | 1652.73113     | 826.86920       | 551.58190       | D             | 1737.84022     | 869.42375       |
| 14 | 1765.81520     | 883.41124       | 589.27658       | L             | 1622.81327     | 811.91028       |
| 15 | 1852.84723     | 926.92725       | 618.28726       | S             | 1509.72921     | 755.36824       |
| 16 | 1989.90614     | 995.45671       | 663.97356       | H             | 1422.69718     | 711.85223       |
| 17 | 2104.93308     | 1052.97018      | 702.31588       | D             | 1285.63827     | 643.32277       |
| 18 | 2219.96002     | 1110.48365      | 740.65819       | D             | 1170.61133     | 585.80930       |
| 19 | 2334.00295     | 1167.50511      | 778.67250       | N             | 1055.58438     | 528.29583       |
| 20 | 2391.02441     | 1196.01585      | 797.67966       | G             | 941.54146      | 471.27437       |
| 21 | 2506.05136     | 1253.52932      | 836.02197       | D             | 884.51999      | 442.76363       |
| 22 | 2603.10412     | 1302.05570      | 868.37289       | P             | 769.49305      | 385.25016       |
| 23 | 2704.15180     | 1352.57954      | 902.05545       | T             | 672.44029      | 336.72378       |
| 24 | 2817.23586     | 1409.12157      | 939.75014       | I             | 571.39261      | 286.19994       |
| 25 | 2930.31993     | 1465.66360      | 977.44483       | L             | 458.30854      | 229.65791       |
| 26 | 2987.34139     | 1494.17433      | 996.45198       | G             | 345.22448      | 173.11588       |
| 27 | 3100.42545     | 1550.71637      | 1034.14667      | L             | 288.20302      | 144.60515       |
| 28 |                |                 |                 | R             | 175.11895      | 88.06311        |

| y <sup>3+</sup> | #2 |
|-----------------|----|
|                 | 28 |
| 972.78205       | 27 |
| 918.42761       | 26 |
| 880.73292       | 25 |
| 857.05388       | 24 |
| 818.71157       | 23 |
| 765.36802       | 22 |
| 727.02571       | 21 |
| 708.01855       | 20 |
| 679.00788       | 19 |
| 641.31319       | 18 |
| 608.96227       | 17 |
| 579.95159       | 16 |
| 541.60928       | 15 |
| 503.91459       | 14 |
| 474.90391       | 13 |
| 429.21761       | 12 |
| 390.87529       | 11 |
| 352.53298       | 10 |
| 314.51867       | 9  |
| 295.51152       | 8  |
| 257.16920       | 7  |
| 224.81828       | 6  |
| 191.13572       | 5  |
| 153.44103       | 4  |
| 115.74634       | 3  |
| 96.73919        | 2  |
| 59.04450        | 1  |

R19\_9696

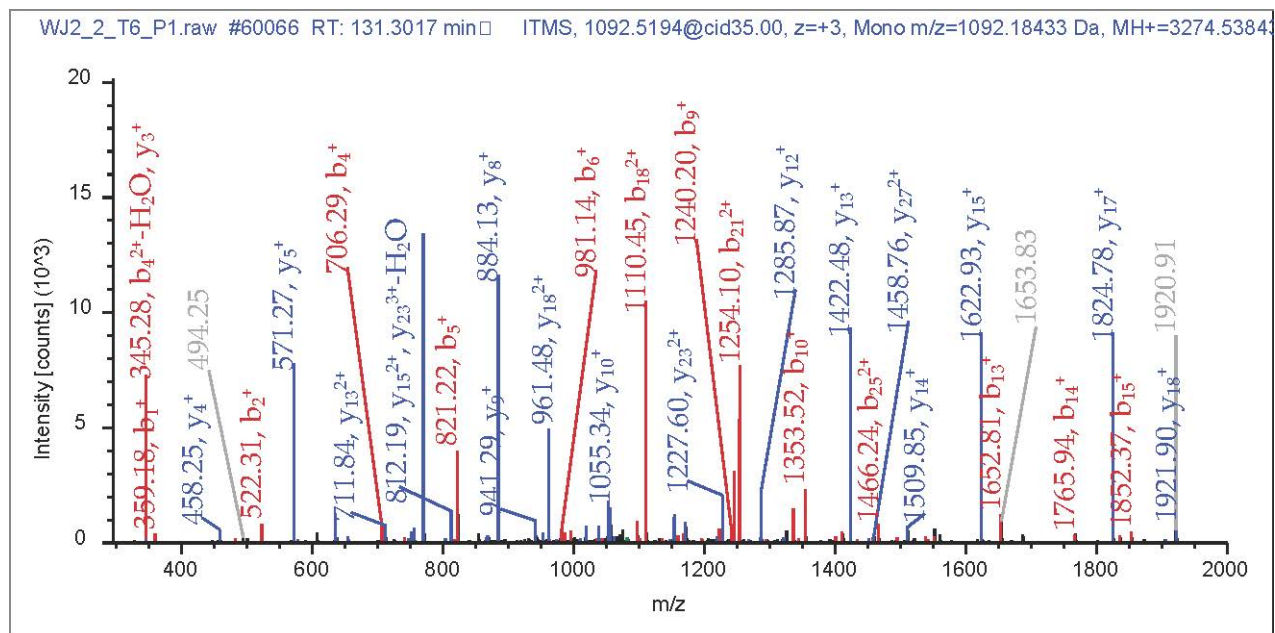

| #1 | b <sup>+</sup> | b <sup>2+</sup> | Seq.       | y <sup>+</sup> | y <sup>2+</sup> | #2 |
|----|----------------|-----------------|------------|----------------|-----------------|----|
| 1  | 377.23862      | 189.12295       | F-TMT6plex |                |                 | 10 |
| 2  | 474.29139      | 237.64933       | P          | 1011.58332     | 506.29530       | 9  |
| 3  | 589.31833      | 295.16280       | D          | 914.53056      | 457.76892       | 8  |
| 4  | 702.40239      | 351.70483       | L          | 799.50361      | 400.25545       | 7  |
| 5  | 815.48646      | 408.24687       | L          | 686.41955      | 343.71341       | 6  |
| 6  | 944.52905      | 472.76816       | E          | 573.33549      | 287.17138       | 5  |
| 7  | 1043.59746     | 522.30237       | V          | 444.29289      | 222.65009       | 4  |
| 8  | 1100.61893     | 550.81310       | G          | 345.22448      | 173.11588       | 3  |
| 9  | 1213.70299     | 607.35513       | L          | 288.20302      | 144.60515       | 2  |
| 10 |                |                 | R          | 175.11895      | 88.06311        | 1  |

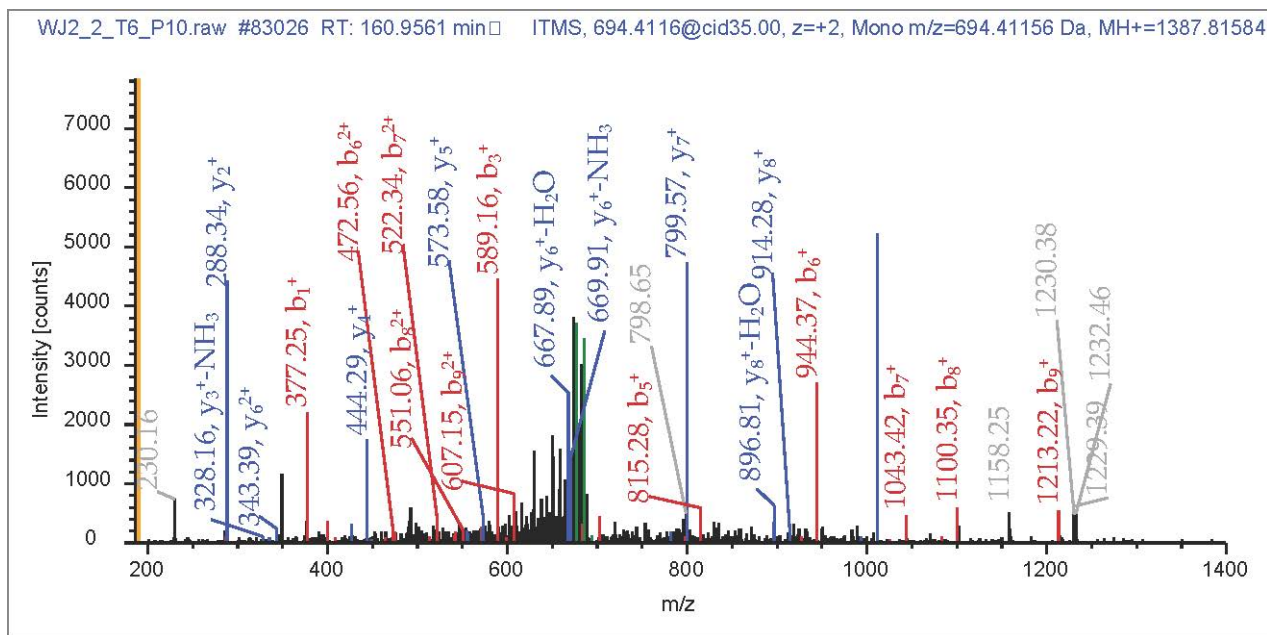

R19\_3303

| #1 | b <sup>+</sup> | b <sup>2+</sup> | b <sup>3+</sup> | Seq.          | y <sup>+</sup> | y <sup>2+</sup> |
|----|----------------|-----------------|-----------------|---------------|----------------|-----------------|
| 1  | 343.25427      | 172.13077       | 115.08961       | I-TMT6plex    |                |                 |
| 2  | 472.29687      | 236.65207       | 158.10381       | E             | 2582.20522     | 1291.60625      |
| 3  | 585.38093      | 293.19410       | 195.79849       | I             | 2453.16263     | 1227.08495      |
| 4  | 656.41804      | 328.71266       | 219.47753       | A             | 2340.07857     | 1170.54292      |
| 5  | 770.46097      | 385.73412       | 257.49184       | N             | 2269.04145     | 1135.02436      |
| 6  | 884.50390      | 442.75559       | 295.50615       | N             | 2154.99853     | 1078.00290      |
| 7  | 981.55666      | 491.28197       | 327.85707       | P             | 2040.95560     | 1020.98144      |
| 8  | 1038.57813     | 519.79270       | 346.86423       | G             | 1943.90283     | 972.45506       |
| 9  | 1125.61015     | 563.30872       | 375.87490       | S             | 1886.88137     | 943.94432       |
| 10 | 1222.66292     | 611.83510       | 408.22582       | P             | 1799.84934     | 900.42831       |
| 11 | 1351.70551     | 676.35639       | 451.24002       | E             | 1702.79658     | 851.90193       |
| 12 | 1479.76409     | 740.38568       | 493.92621       | Q             | 1573.75399     | 787.38063       |
| 13 | 1594.79103     | 797.89915       | 532.26853       | D             | 1445.69541     | 723.35134       |
| 14 | 1665.82814     | 833.41771       | 555.94757       | A             | 1330.66846     | 665.83787       |
| 15 | 1812.89656     | 906.95192       | 604.97037       | F             | 1259.63135     | 630.31931       |
| 16 | 1972.92721     | 986.96724       | 658.31392       | Carbamidomett | 1112.56294     | 556.78511       |
| 17 | 2029.94867     | 1015.47797      | 677.32107       | G             | 952.53229      | 476.76978       |
| 18 | 2086.97013     | 1043.98871      | 696.32823       | G             | 895.51083      | 448.25905       |
| 19 | 2200.05420     | 1100.53074      | 734.02292       | L             | 838.48936      | 419.74832       |
| 20 | 2287.08623     | 1144.04675      | 763.03359       | S             | 725.40530      | 363.20629       |
| 21 | 2401.12915     | 1201.06822      | 801.04790       | N             | 638.37327      | 319.69027       |
| 22 | 2500.19757     | 1250.60242      | 834.07071       | V             | 524.33034      | 262.66881       |
| 23 | 2637.25648     | 1319.13188      | 879.75701       | H             | 425.26193      | 213.13460       |
| 24 | 2750.34054     | 1375.67391      | 917.45170       | I             | 288.20302      | 144.60515       |
| 25 |                |                 |                 | R             | 175.11895      | 88.06311        |

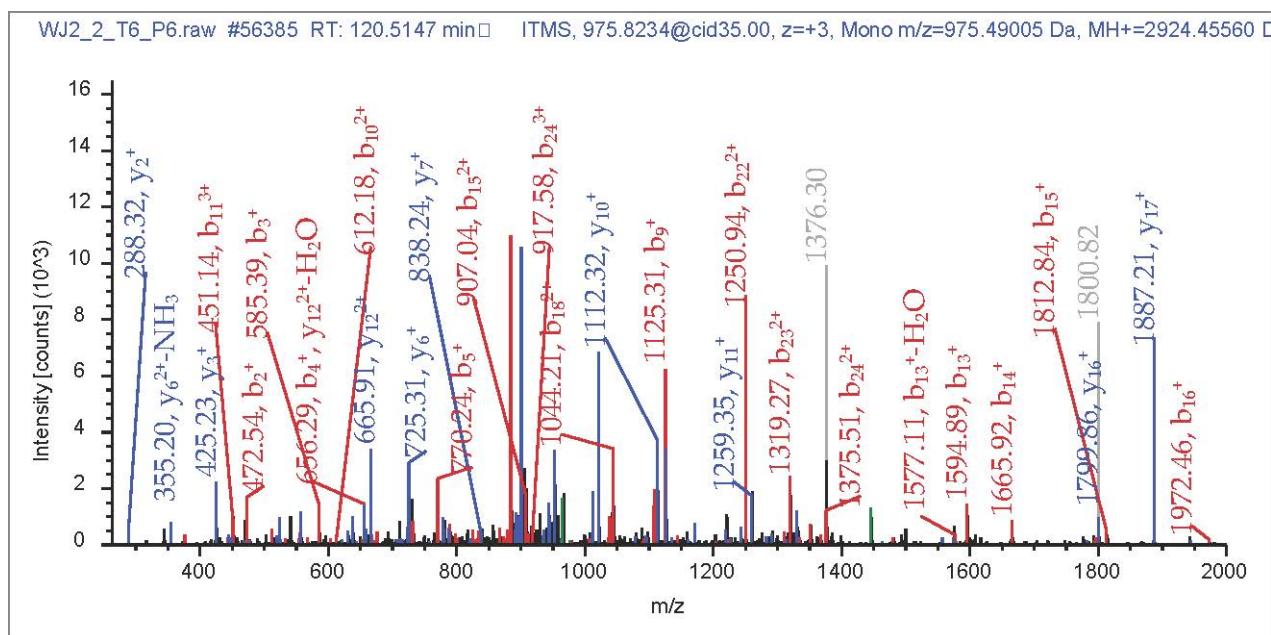

R19\_2295

| $y^{3+}$  | #2 |
|-----------|----|
|           | 25 |
| 861.40659 | 24 |
| 818.39239 | 23 |
| 780.69771 | 22 |
| 757.01867 | 21 |
| 719.00436 | 20 |
| 680.99005 | 19 |
| 648.63913 | 18 |
| 629.63197 | 17 |
| 600.62130 | 16 |
| 568.27038 | 15 |
| 525.25618 | 14 |
| 482.56999 | 13 |
| 444.22767 | 12 |
| 420.54863 | 11 |
| 371.52583 | 10 |
| 318.18228 | 9  |
| 299.17513 | 8  |
| 280.16797 | 7  |
| 242.47328 | 6  |
| 213.46261 | 5  |
| 175.44830 | 4  |
| 142.42549 | 3  |
| 96.73919  | 2  |
| 59.04450  | 1  |



| #1 | b <sup>+</sup> | b <sup>2+</sup> | Seq.       | y <sup>+</sup> | y <sup>2+</sup> | #2 |
|----|----------------|-----------------|------------|----------------|-----------------|----|
| 1  | 343.25427      | 172.13077       | L-TMT6plex |                |                 | 10 |
| 2  | 414.29139      | 207.64933       | A          | 1078.58914     | 539.79821       | 9  |
| 3  | 515.33906      | 258.17317       | T          | 1007.55202     | 504.27965       | 8  |
| 4  | 678.40239      | 339.70483       | Y          | 906.50434      | 453.75581       | 7  |
| 5  | 791.48646      | 396.24687       | L          | 743.44101      | 372.22415       | 6  |
| 6  | 890.55487      | 445.78107       | V          | 630.35695      | 315.68211       | 5  |
| 7  | 1019.59746     | 510.30237       | E          | 531.28854      | 266.14791       | 4  |
| 8  | 1133.64039     | 567.32383       | N          | 402.24594      | 201.62661       | 3  |
| 9  | 1246.72446     | 623.86587       | L          | 288.20302      | 144.60515       | 2  |
| 10 |                |                 | R          | 175.11895      | 88.06311        | 1  |

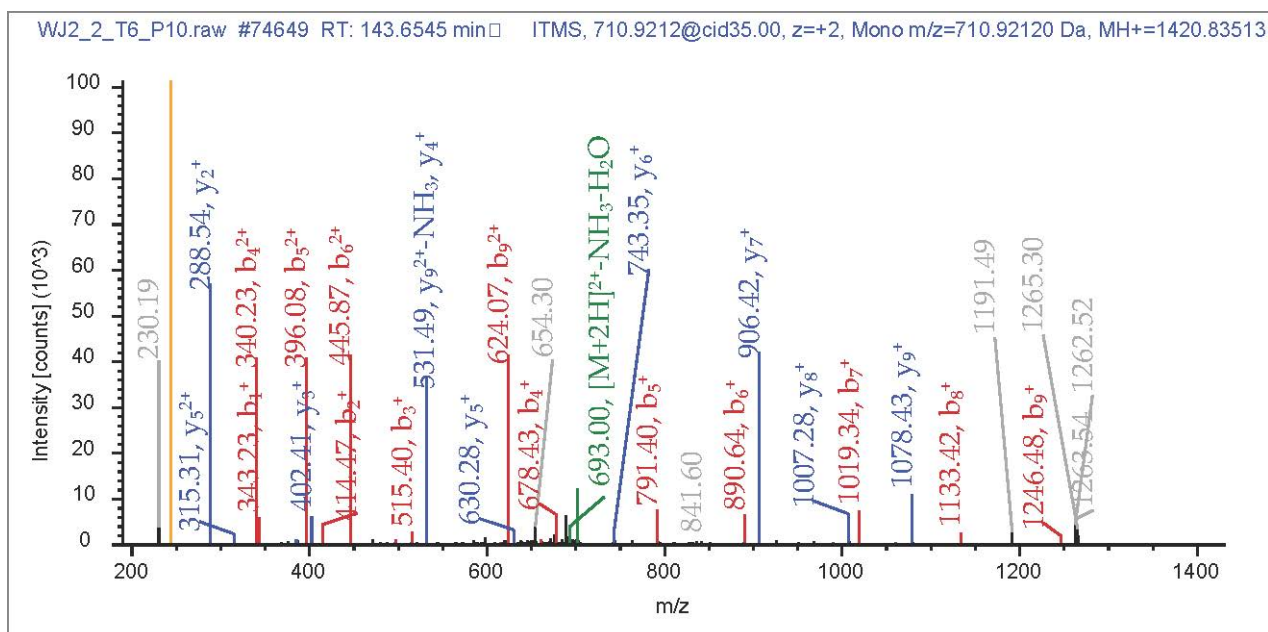

R19\_6690



| #1 | b <sup>+</sup> | b <sup>2+</sup> | Seq.        | y <sup>+</sup> | y <sup>2+</sup> | #2 |
|----|----------------|-----------------|-------------|----------------|-----------------|----|
| 1  | 317.20224      | 159.10476       | S-TMT6plex  |                |                 | 13 |
| 2  | 388.23935      | 194.62331       | A           | 1281.66702     | 641.33715       | 12 |
| 3  | 445.26081      | 223.13405       | G           | 1210.62990     | 605.81859       | 11 |
| 4  | 516.29793      | 258.65260       | A           | 1153.60844     | 577.30786       | 10 |
| 5  | 573.31939      | 287.16333       | G           | 1082.57133     | 541.78930       | 9  |
| 6  | 630.34086      | 315.67407       | G           | 1025.54986     | 513.27857       | 8  |
| 7  | 717.37288      | 359.19008       | S           | 968.52840      | 484.76784       | 7  |
| 8  | 804.40491      | 402.70609       | S           | 881.49637      | 441.25182       | 6  |
| 9  | 861.42638      | 431.21683       | G           | 794.46434      | 397.73581       | 5  |
| 10 | 962.47405      | 481.74067       | T           | 737.44288      | 369.22508       | 4  |
| 11 | 1109.50945     | 555.25837       | M-Oxidation | 636.39520      | 318.70124       | 3  |
| 12 | 1222.59352     | 611.80040       | L           | 489.35980      | 245.18354       | 2  |
| 13 |                |                 | K-TMT6plex  | 376.27574      | 188.64151       | 1  |

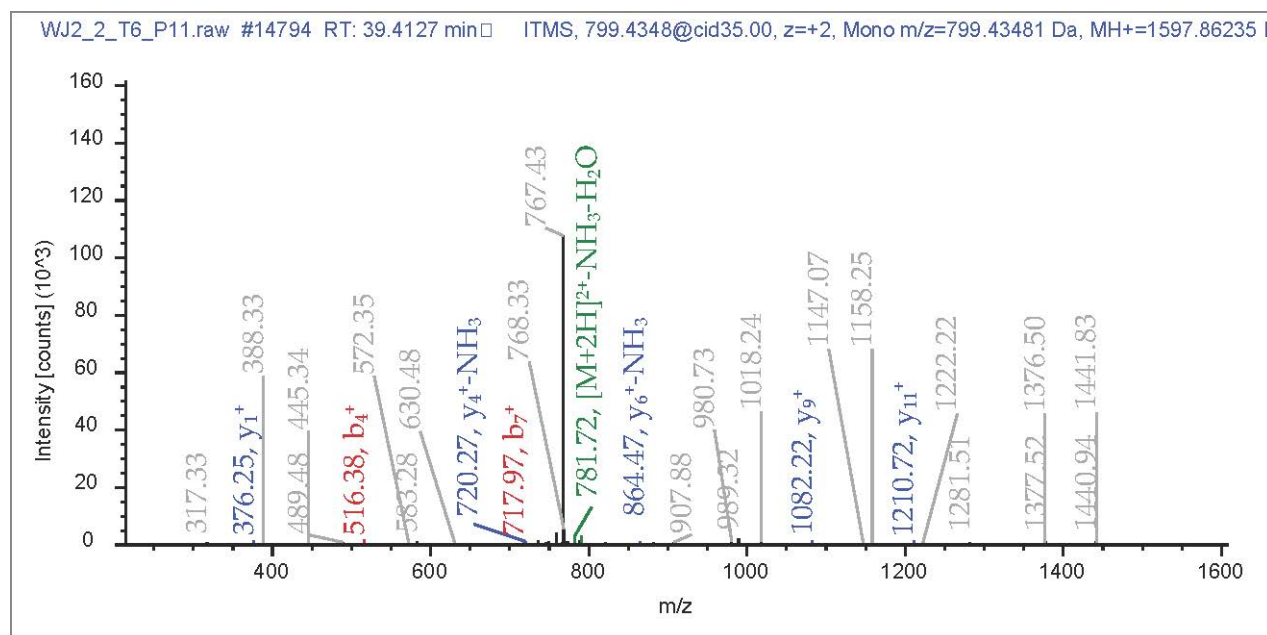

R19\_4354

| #1 | b <sup>+</sup> | b <sup>2+</sup> | Seq.          | y <sup>+</sup> | y <sup>2+</sup> | #2 |
|----|----------------|-----------------|---------------|----------------|-----------------|----|
| 1  | 317.20224      | 159.10476       | S-TMT6plex    |                |                 | 12 |
| 2  | 477.23289      | 239.12008       | Carbamidomett | 1479.75623     | 740.38175       | 11 |
| 3  | 564.26491      | 282.63610       | S             | 1319.72558     | 660.36643       | 10 |
| 4  | 635.30203      | 318.15465       | A             | 1232.69355     | 616.85041       | 9  |
| 5  | 750.32897      | 375.66812       | D             | 1161.65644     | 581.33186       | 8  |
| 6  | 837.36100      | 419.18414       | S             | 1046.62949     | 523.81838       | 7  |
| 7  | 950.44506      | 475.72617       | L             | 959.59746      | 480.30237       | 6  |
| 8  | 1079.48766     | 540.24747       | E             | 846.51340      | 423.76034       | 5  |
| 9  | 1194.51460     | 597.76094       | D             | 717.47081      | 359.23904       | 4  |
| 10 | 1307.59866     | 654.30297       | L             | 602.44386      | 301.72557       | 3  |
| 11 | 1420.68273     | 710.84500       | L             | 489.35980      | 245.18354       | 2  |
| 12 |                |                 | K-TMT6plex    | 376.27574      | 188.64151       | 1  |

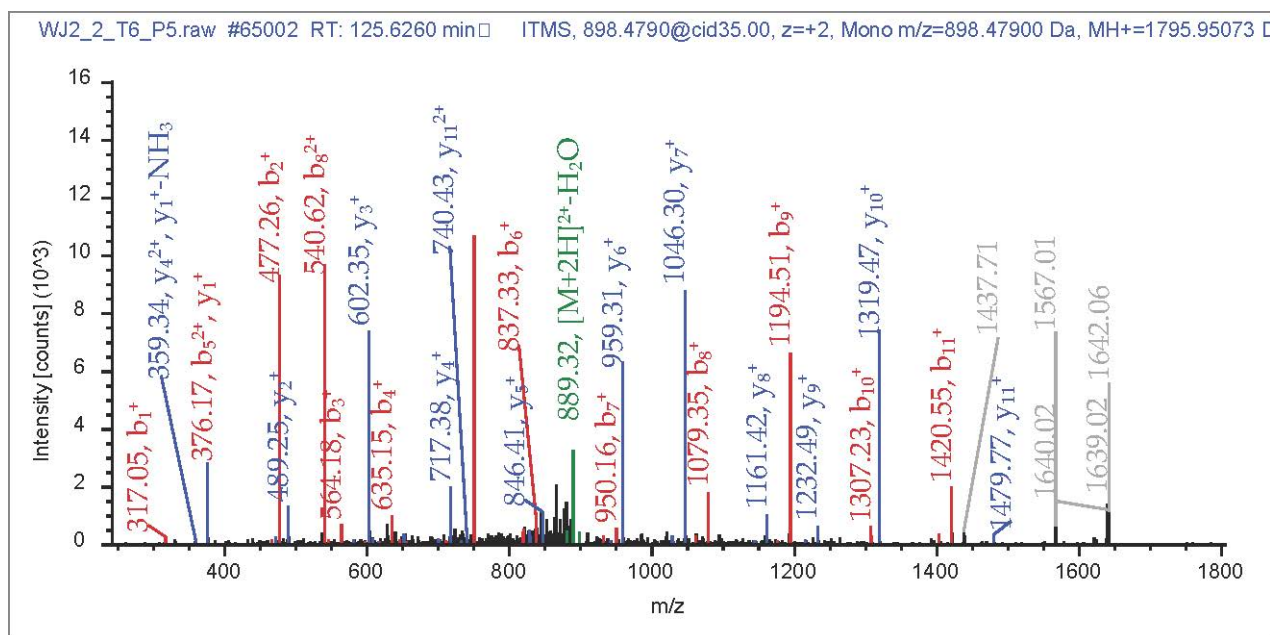

R19\_9448

| #1 | b <sup>+</sup> | b <sup>2+</sup> | Seq.       | y <sup>+</sup> | y <sup>2+</sup> | #2 |
|----|----------------|-----------------|------------|----------------|-----------------|----|
| 1  | 317.20224      | 159.10476       | S-TMT6plex |                |                 | 9  |
| 2  | 404.23427      | 202.62077       | S          | 794.40027      | 397.70377       | 8  |
| 3  | 491.26629      | 246.13679       | S          | 707.36824      | 354.18776       | 7  |
| 4  | 604.35036      | 302.67882       | L          | 620.33621      | 310.67175       | 6  |
| 5  | 691.38239      | 346.19483       | S          | 507.25215      | 254.12971       | 5  |
| 6  | 778.41441      | 389.71085       | S          | 420.22012      | 210.61370       | 4  |
| 7  | 849.45153      | 425.22940       | A          | 333.18809      | 167.09769       | 3  |
| 8  | 936.48356      | 468.74542       | S          | 262.15098      | 131.57913       | 2  |
| 9  |                |                 | R          | 175.11895      | 88.06311        | 1  |

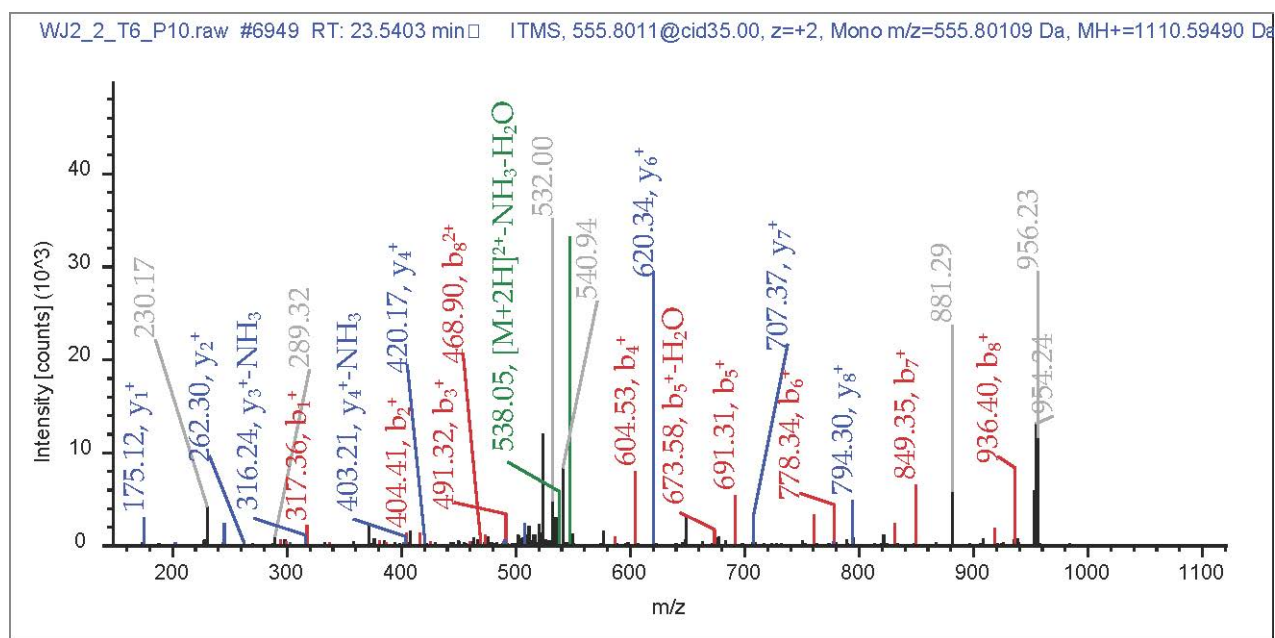

R19\_8545

| #1 | b <sup>+</sup> | b <sup>2+</sup> | Seq.          | y <sup>+</sup> | y <sup>2+</sup> | #2 |
|----|----------------|-----------------|---------------|----------------|-----------------|----|
| 1  | 331.21789      | 166.11258       | T-TMT6plex    |                |                 | 11 |
| 2  | 478.25329      | 239.63028       | M-Oxidation   | 1268.52456     | 634.76592       | 10 |
| 3  | 607.29588      | 304.15158       | E             | 1121.48916     | 561.24822       | 9  |
| 4  | 720.37994      | 360.69361       | I             | 992.44657      | 496.72692       | 8  |
| 5  | 880.41059      | 440.70893       | Carbamidomett | 879.36251      | 440.18489       | 7  |
| 6  | 1009.45319     | 505.23023       | E             | 719.33186      | 360.16957       | 6  |
| 7  | 1138.49578     | 569.75153       | E             | 590.28926      | 295.64827       | 5  |
| 8  | 1252.53871     | 626.77299       | N             | 461.24667      | 231.12697       | 4  |
| 9  | 1323.57582     | 662.29155       | A             | 347.20374      | 174.10551       | 3  |
| 10 | 1424.62350     | 712.81539       | T             | 276.16663      | 138.58695       | 2  |
| 11 |                |                 | R             | 175.11895      | 88.06311        | 1  |

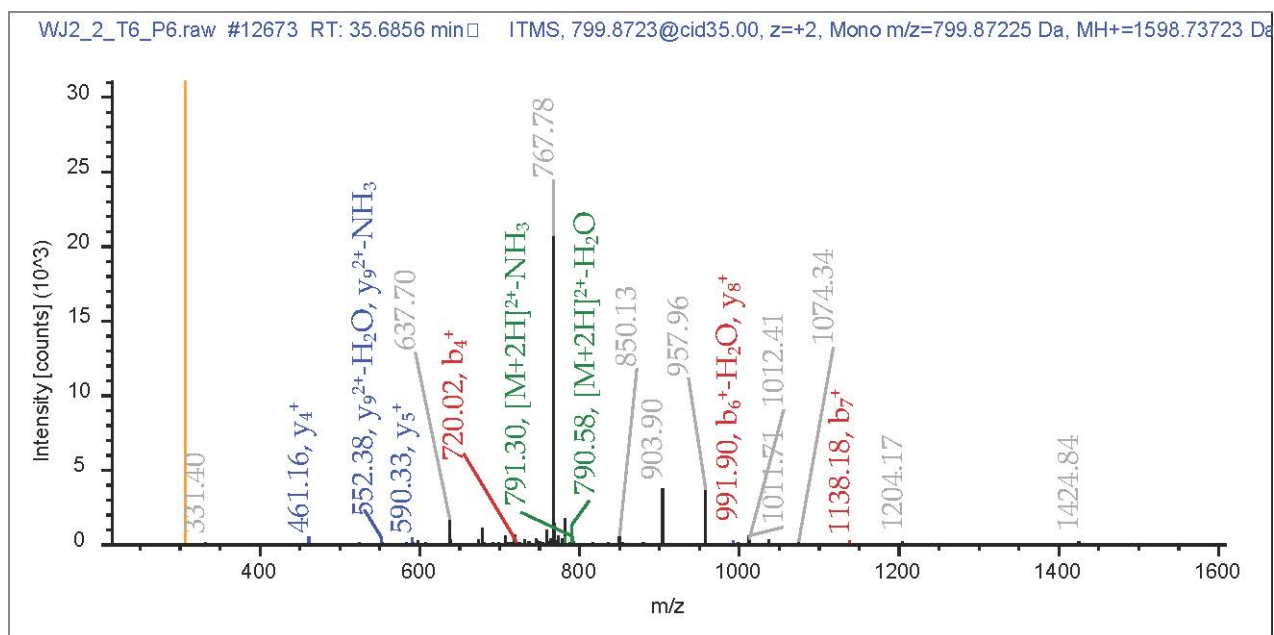

R19\_8696

| #1 | b <sup>+</sup> | b <sup>2+</sup> | Seq.          | y <sup>+</sup> | y <sup>2+</sup> | #2 |
|----|----------------|-----------------|---------------|----------------|-----------------|----|
| 1  | 329.23862      | 165.12295       | V-TMT6plex    |                |                 | 15 |
| 2  | 444.26557      | 222.63642       | D             | 1484.65735     | 742.83231       | 14 |
| 3  | 515.30268      | 258.15498       | A             | 1369.63041     | 685.31884       | 13 |
| 4  | 616.35036      | 308.67882       | T             | 1298.59329     | 649.80029       | 12 |
| 5  | 779.41369      | 390.21048       | Y             | 1197.54562     | 599.27645       | 11 |
| 6  | 878.48210      | 439.74469       | V             | 1034.48229     | 517.74478       | 10 |
| 7  | 1007.52469     | 504.26598       | E             | 935.41387      | 468.21057       | 9  |
| 8  | 1106.59311     | 553.80019       | V             | 806.37128      | 403.68928       | 8  |
| 9  | 1235.63570     | 618.32149       | E             | 707.30287      | 354.15507       | 7  |
| 10 | 1306.67281     | 653.84005       | A             | 578.26027      | 289.63377       | 6  |
| 11 | 1393.70484     | 697.35606       | S             | 507.22316      | 254.11522       | 5  |
| 12 | 1464.74196     | 732.87462       | A             | 420.19113      | 210.59920       | 4  |
| 13 | 1624.77260     | 812.88994       | Carbamidometh | 349.15402      | 175.08065       | 3  |
| 14 | 1681.79407     | 841.40067       | G             | 189.12337      | 95.06532        | 2  |
| 15 |                |                 | L             | 132.10191      | 66.55459        | 1  |

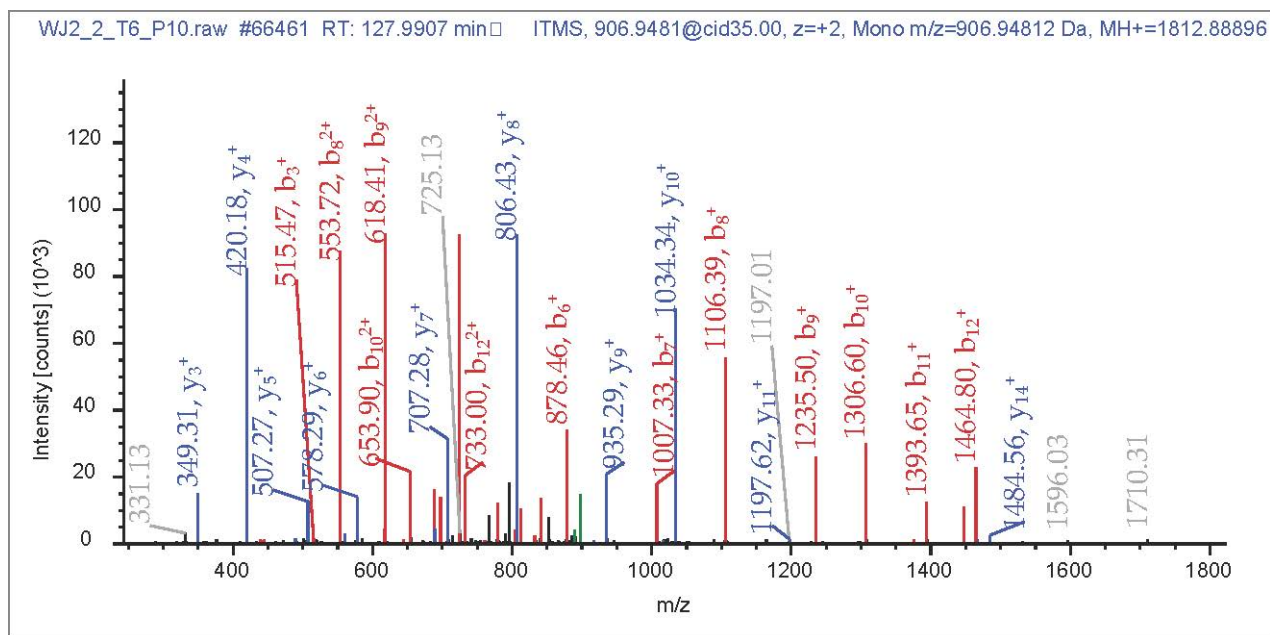

R19\_8870

| #1 | b <sup>+</sup> | b <sup>2+</sup> | b <sup>3+</sup> | Seq.          | y <sup>+</sup> | y <sup>2+</sup> |
|----|----------------|-----------------|-----------------|---------------|----------------|-----------------|
| 1  | 329.23862      | 165.12295       | 110.41773       | V-TMT6plex    |                |                 |
| 2  | 444.26557      | 222.63642       | 148.76004       | D             | 3074.47605     | 1537.74166      |
| 3  | 557.34963      | 279.17845       | 186.45473       | I             | 2959.44911     | 1480.22819      |
| 4  | 658.39731      | 329.70229       | 220.13729       | T             | 2846.36504     | 1423.68616      |
| 5  | 772.44024      | 386.72376       | 258.15160       | N             | 2745.31737     | 1373.16232      |
| 6  | 885.52430      | 443.26579       | 295.84628       | I             | 2631.27444     | 1316.14086      |
| 7  | 982.57706      | 491.79217       | 328.19721       | P             | 2518.19037     | 1259.59883      |
| 8  | 1083.62474     | 542.31601       | 361.87976       | T             | 2421.13761     | 1211.07244      |
| 9  | 1196.70881     | 598.85804       | 399.57445       | L             | 2320.08993     | 1160.54860      |
| 10 | 1356.73945     | 678.87337       | 452.91800       | Carbamidomett | 2207.00587     | 1104.00657      |
| 11 | 1519.80278     | 760.40503       | 507.27245       | Y             | 2046.97522     | 1023.99125      |
| 12 | 1633.84571     | 817.42649       | 545.28675       | N             | 1883.91189     | 942.45958       |
| 13 | 1748.87265     | 874.93996       | 583.62907       | D             | 1769.86896     | 885.43812       |
| 14 | 1908.90330     | 954.95529       | 636.97262       | Carbamidomett | 1654.84202     | 827.92465       |
| 15 | 1995.93533     | 998.47130       | 665.98329       | S             | 1494.81137     | 747.90932       |
| 16 | 2110.96227     | 1055.98477      | 704.32561       | D             | 1407.77934     | 704.39331       |
| 17 | 2181.99939     | 1091.50333      | 728.00465       | A             | 1292.75240     | 646.87984       |
| 18 | 2253.03650     | 1127.02189      | 751.68368       | A             | 1221.71529     | 611.36128       |
| 19 | 2390.09541     | 1195.55134      | 797.36999       | H             | 1150.67817     | 575.84273       |
| 20 | 2519.13800     | 1260.07264      | 840.38419       | E             | 1013.61926     | 507.31327       |
| 21 | 2616.19077     | 1308.59902      | 872.73511       | P             | 884.57667      | 442.79197       |
| 22 | 2744.24935     | 1372.62831      | 915.42130       | Q             | 787.52391      | 394.26559       |
| 23 | 2857.33341     | 1429.17034      | 953.11599       | L             | 659.46533      | 330.23630       |
| 24 | 2970.41747     | 1485.71238      | 990.81068       | L             | 546.38126      | 273.69427       |
| 25 | 3027.43894     | 1514.22311      | 1009.81783      | G             | 433.29720      | 217.15224       |
| 26 |                |                 |                 | K-TMT6plex    | 376.27574      | 188.64151       |

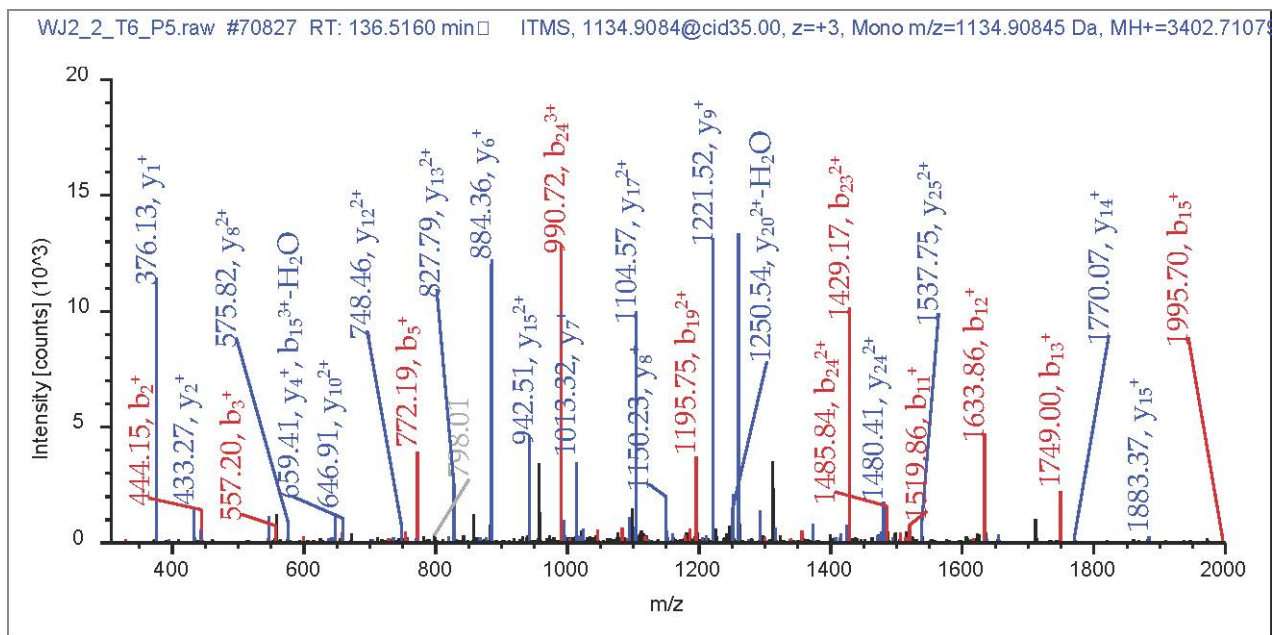

R19\_10303

| $y^{3+}$   | #2 |
|------------|----|
|            | 26 |
| 1025.49687 | 25 |
| 987.15455  | 24 |
| 949.45987  | 23 |
| 915.77731  | 22 |
| 877.76300  | 21 |
| 840.06831  | 20 |
| 807.71739  | 19 |
| 774.03483  | 18 |
| 736.34014  | 17 |
| 682.99659  | 16 |
| 628.64215  | 15 |
| 590.62784  | 14 |
| 552.28552  | 13 |
| 498.94198  | 12 |
| 469.93130  | 11 |
| 431.58898  | 10 |
| 407.90995  | 9  |
| 384.23091  | 8  |
| 338.54461  | 7  |
| 295.53041  | 6  |
| 263.17949  | 5  |
| 220.49329  | 4  |
| 182.79861  | 3  |
| 145.10392  | 2  |
| 126.09676  | 1  |
